# Supplementary material for: SARS-CoV-2-related bat viruses evade human intrinsic immunity but lack efficient transmission capacity
Source: Springer Nature journal article supplement (doi:10.1038/s41564-024-01765-z), 2024-07-29

---

# **SARS-CoV-2-related bat viruses evade human intrinsic immunity but lack efficient transmission capacity**

---

In the format provided by the authors and unedited

---

Uncropped gel from Extended Data 2A

SCE 2021-12-04 12hr 57min

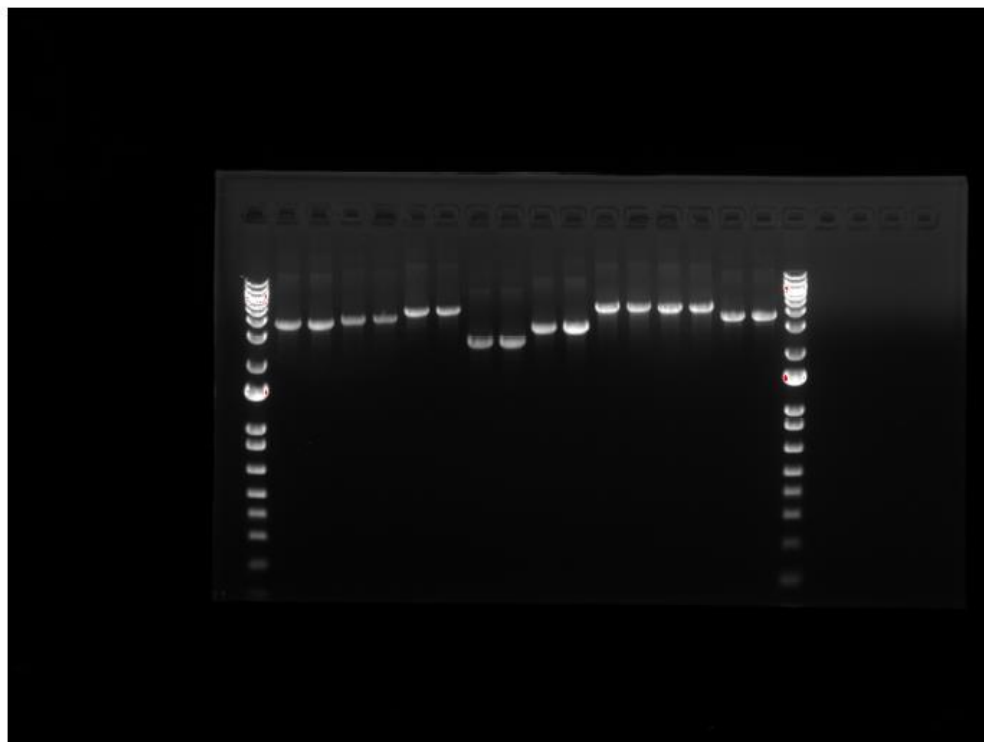

Printed: 12/4/2021 12:59:31 PM

Page 1 of 1

Uncropped gel from Extended Data 2B

SCE 2022-02-17 12hr 28min

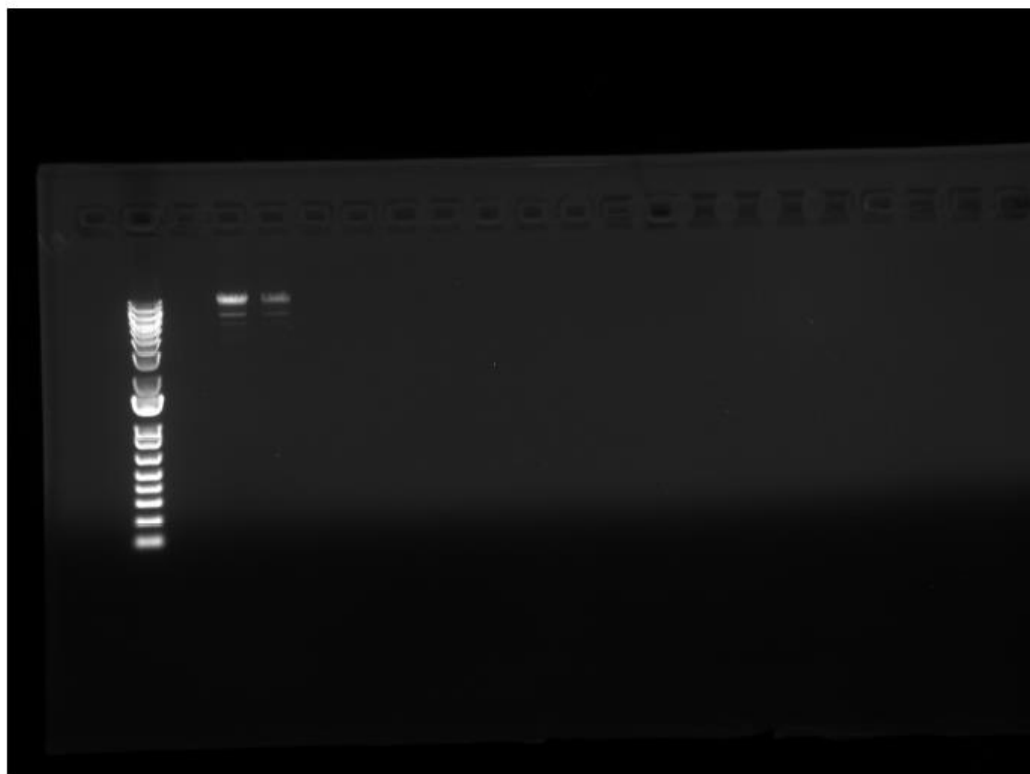

Printed: 2/17/2022 12:30:35 PM

Page 1 of 1

**Raw images from Extended Data 2E**

Mock infected cells:

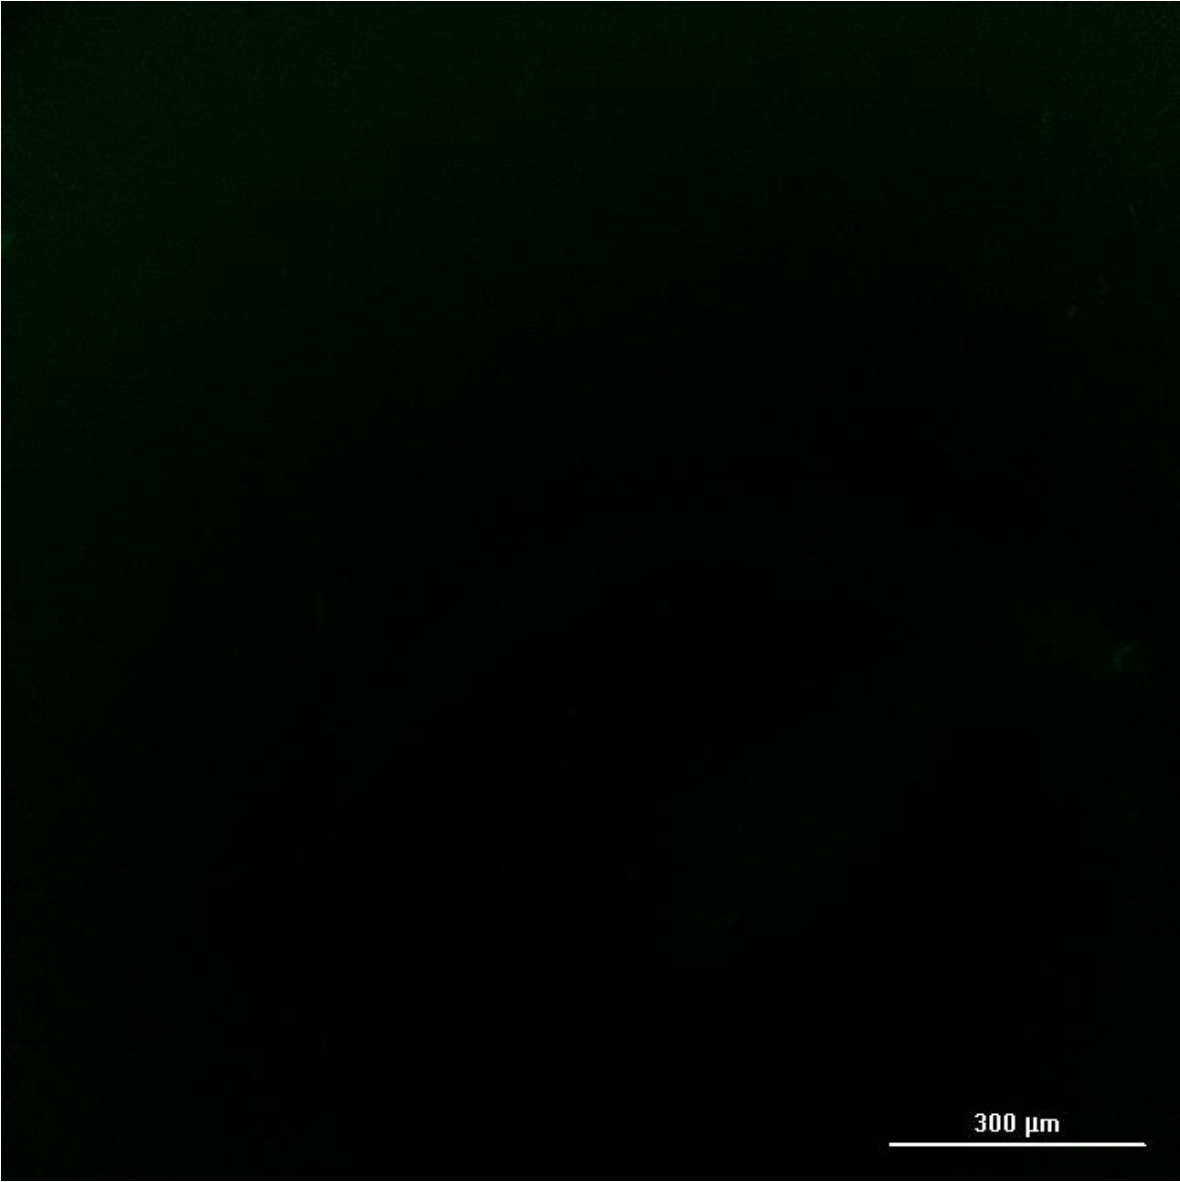

SARS-2 mNG infected cells:

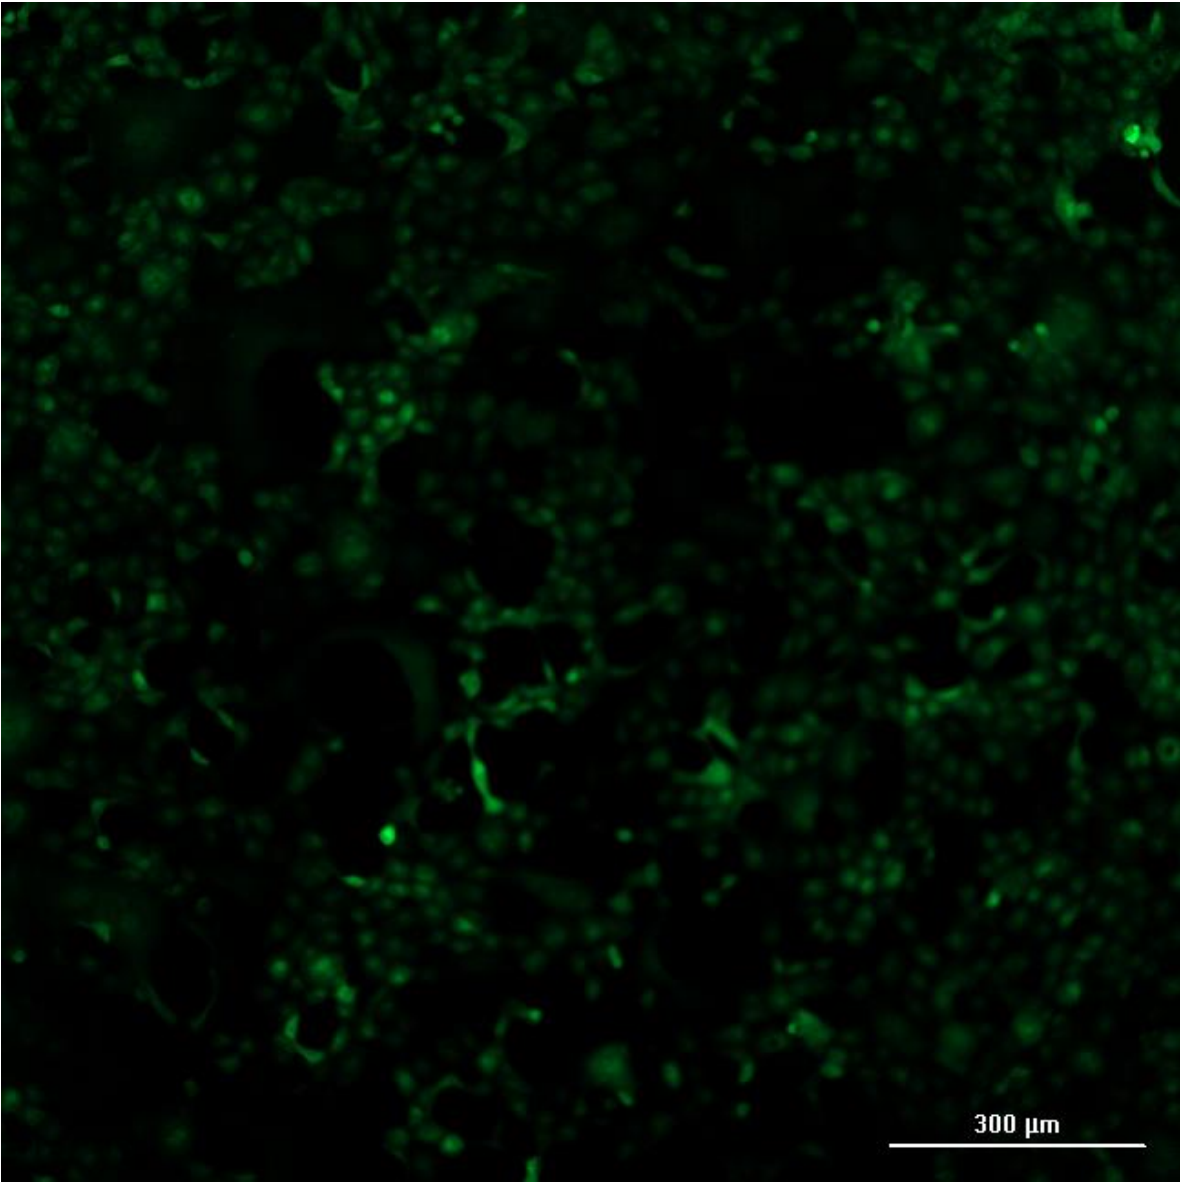

BANAL-52 mNG infected cells:

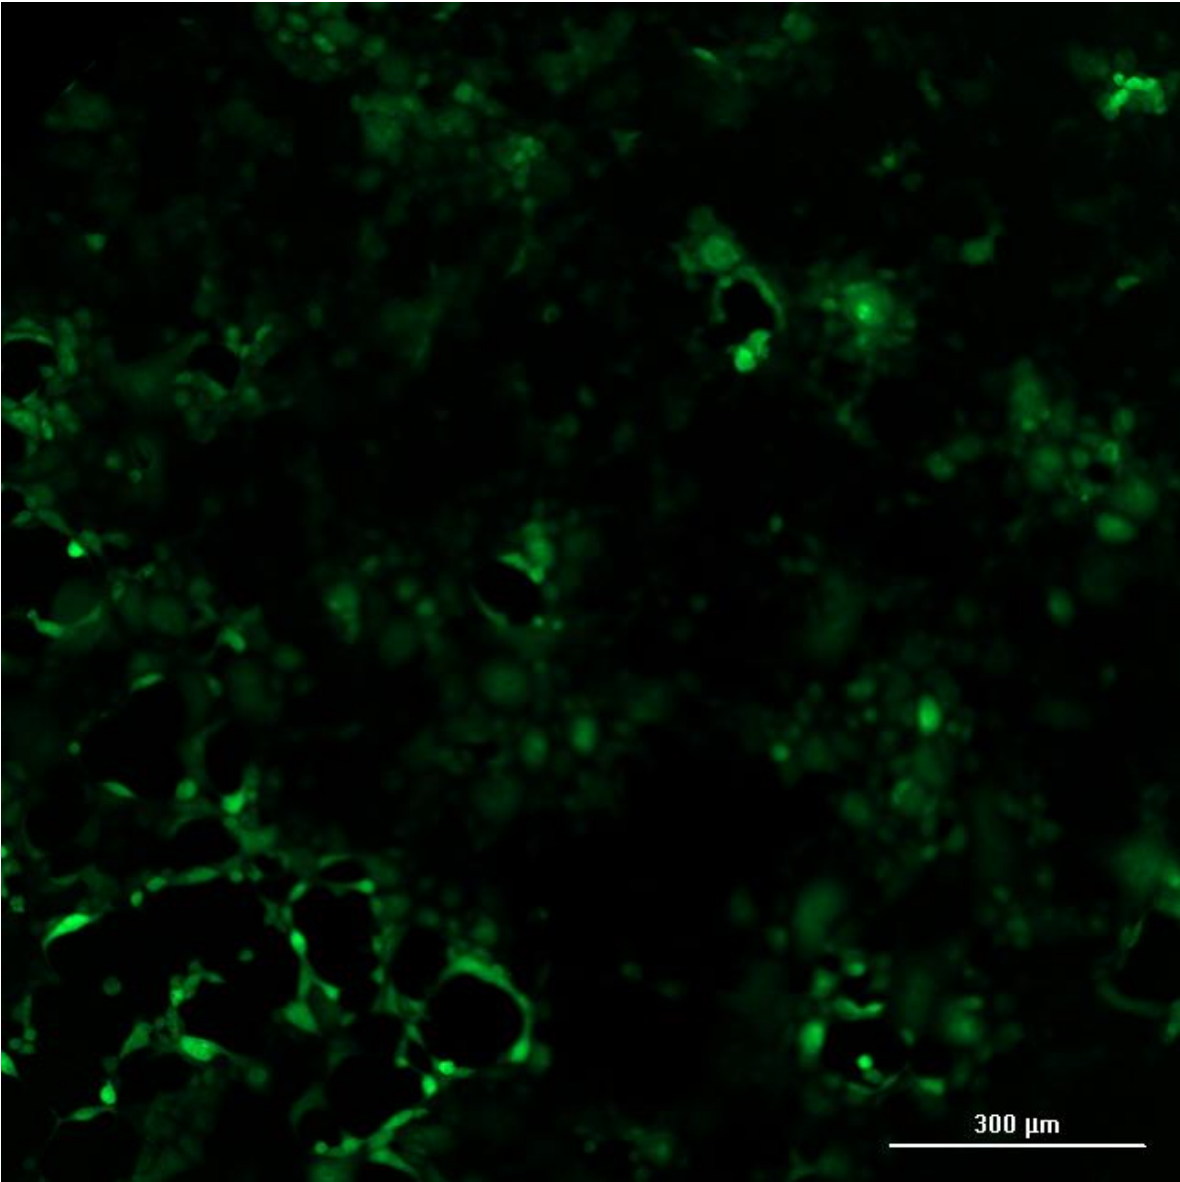

BANAL-236 mNG infected cells:

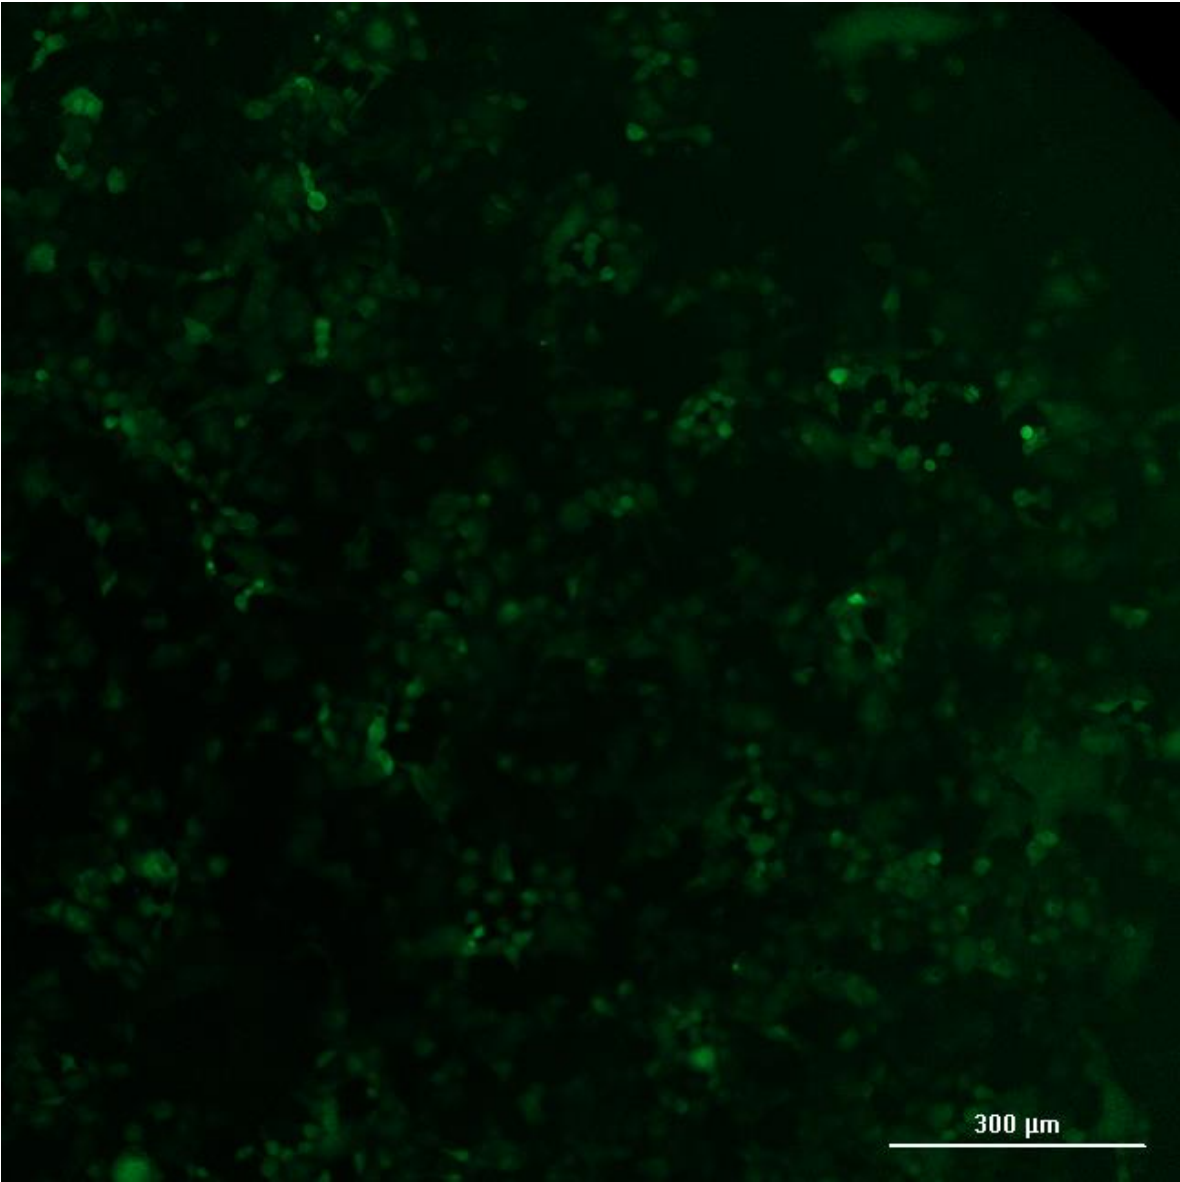

**Raw images from Extended Data 6B:**

Uninfected hamster:

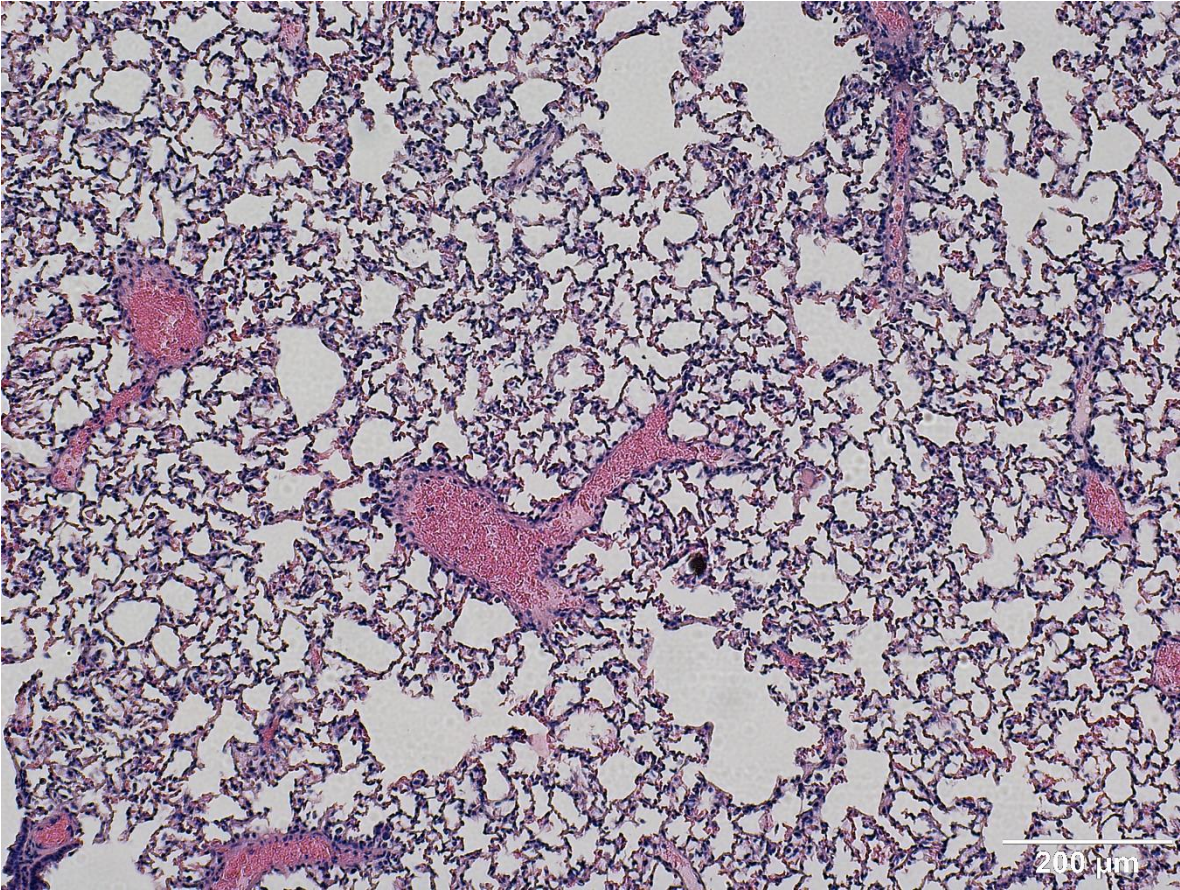



SARS-2 infected hamster:

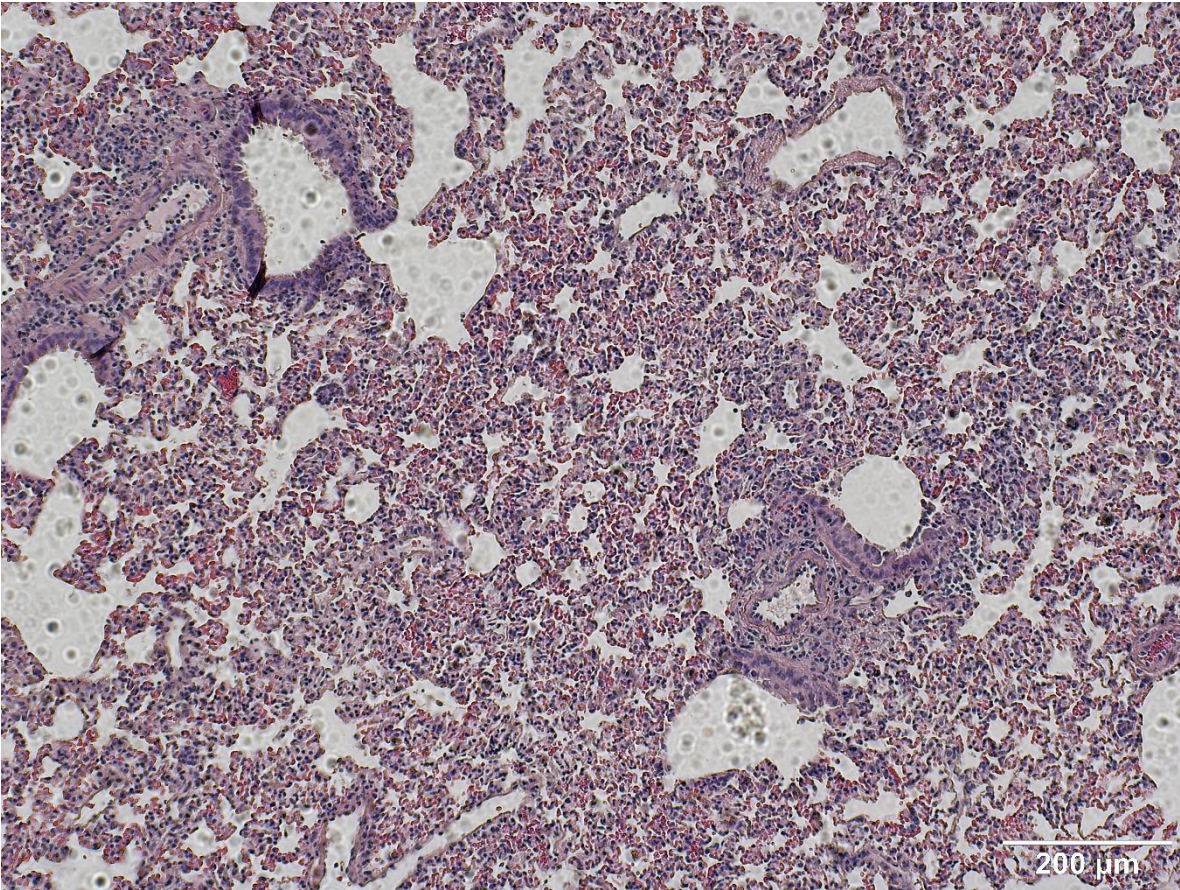

**BANAL-52 infected hamster:**

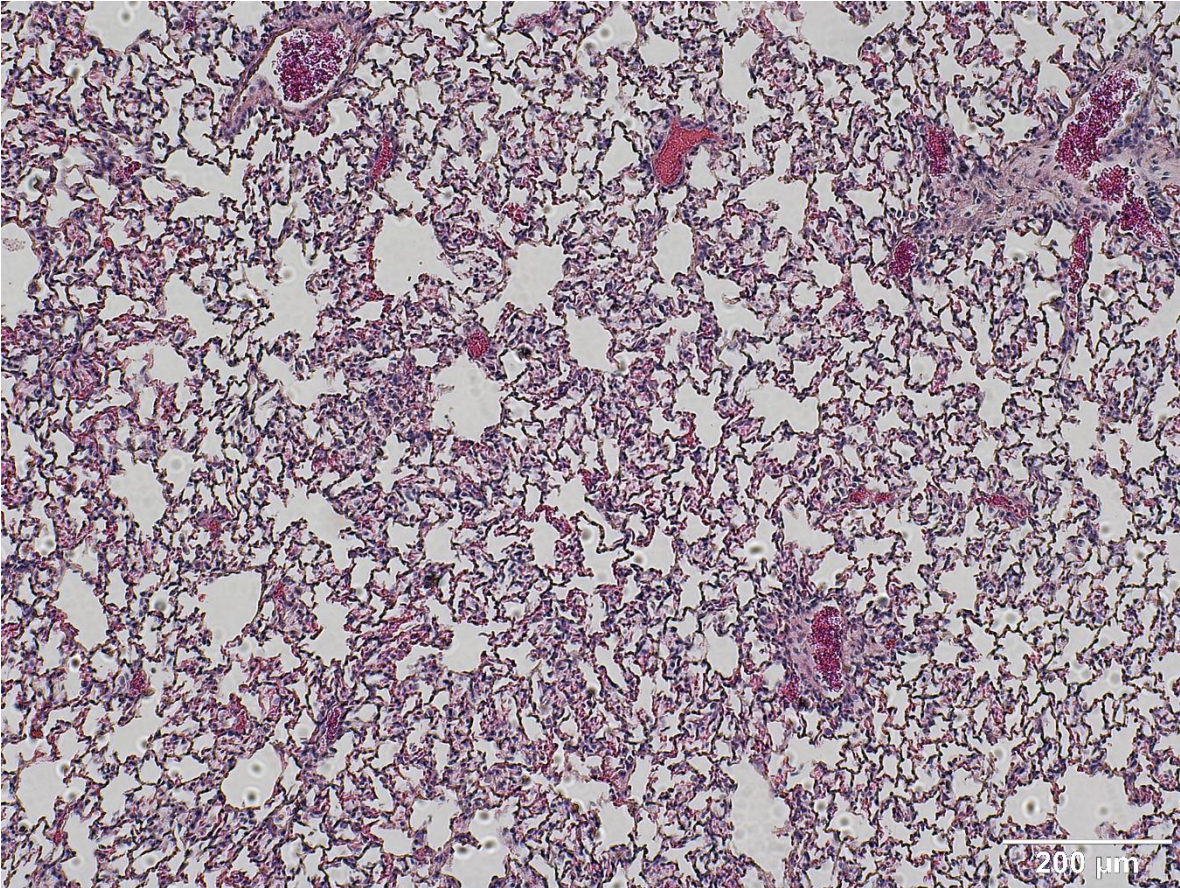

BANAL-236 infected hamster:

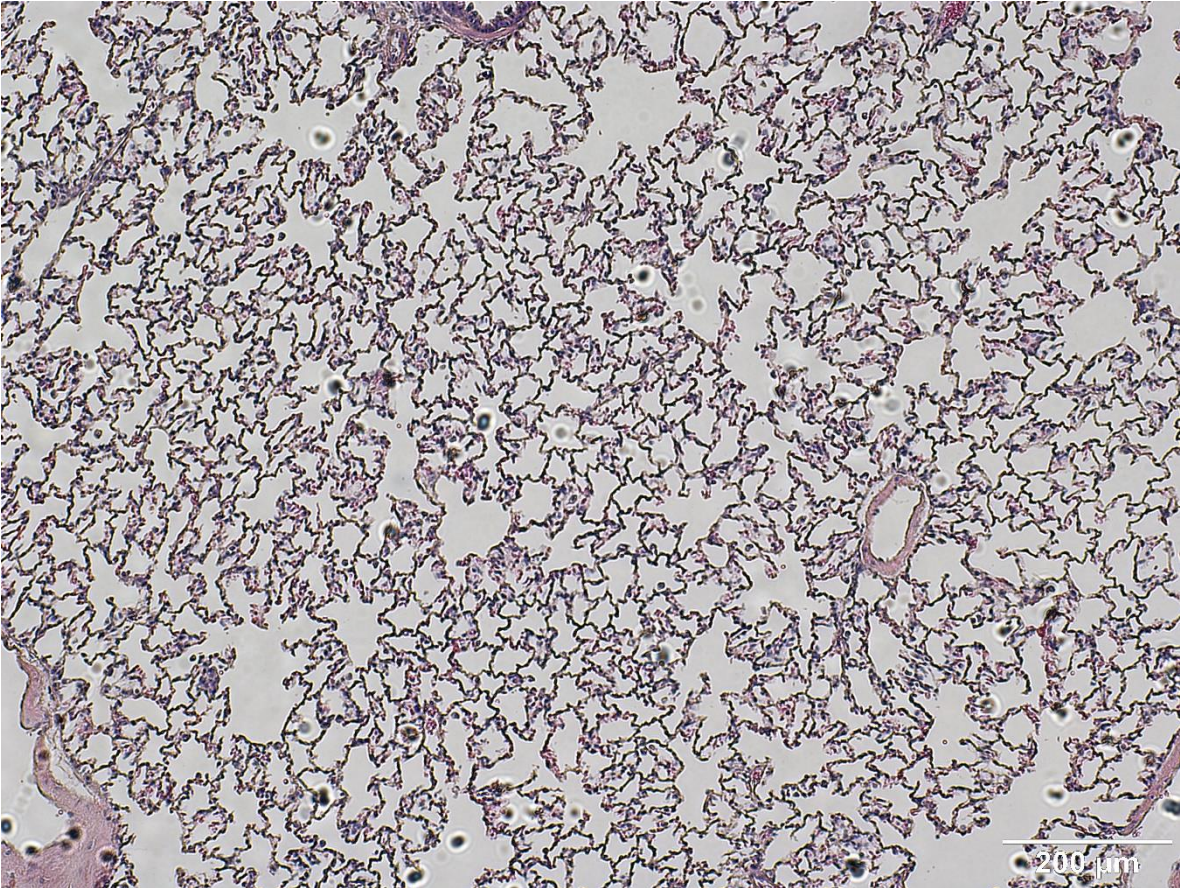

Supplement: 41564_2024_1765_MOESM1_ESM.pdf [file 41564_2024_1765_MOESM1_ESM.pdf]
